# Supplementary material
Source: Springer Nature journal article supplement (https://www.springermedizin.de/resource/supplementary/12937_2011_462_MOESM1_ESM.pdf/25653148)

### Female Head

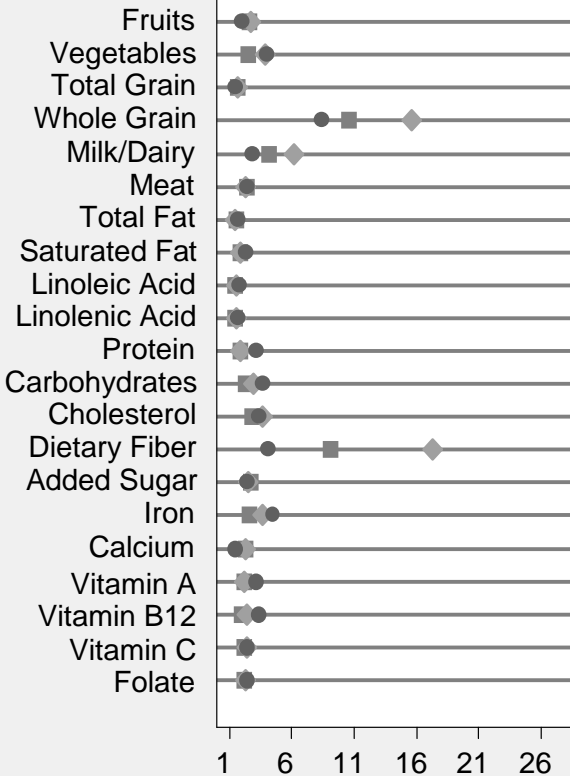

### Male Head

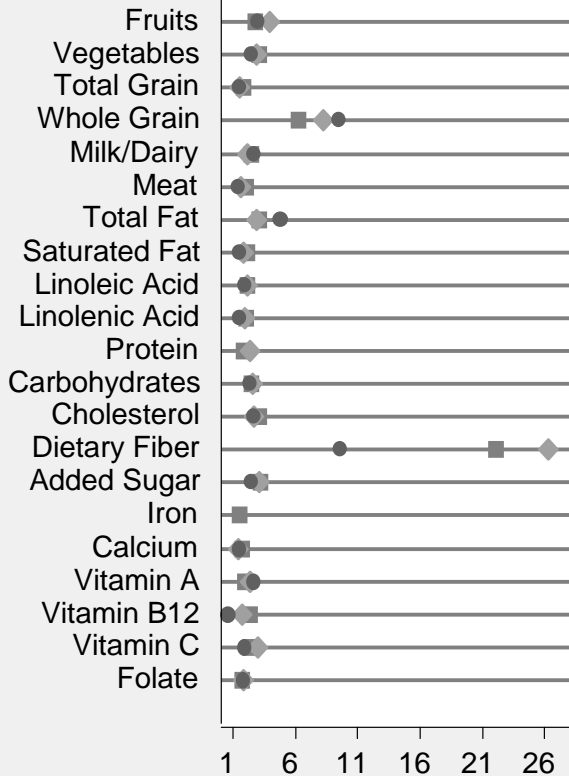

Supplement: MOESM1 [file 25653148]
